# Supplementary material for: Protective and Anti-Inflammatory Effects of Protegrin-1 on Citrobacter rodentium Intestinal Infection in Mice
Source: MDPI journal article supplement (doi:10.3390/ijms22179494), 2021-08-31
Supplement: s1 [file s1]

## Supplementary materials

Table S1. Definition of categories and general criteria for histomorphological scoring.

| CATEGORY                        | CRITERION         | DEFINITION                                                                                                                                                                                                                                                                                                                         | SCORE VALUE <sup>1</sup> |
|---------------------------------|-------------------|------------------------------------------------------------------------------------------------------------------------------------------------------------------------------------------------------------------------------------------------------------------------------------------------------------------------------------|--------------------------|
| Inflammatory Cell Infiltrate    | Severity          | Neutrophil density (per ten 400x high-power fields; field diameter of 0.45 mm):<br>0 = No neutrophils<br>1 = 1 or 2 neutrophils<br>2 = 3 - 5 neutrophils<br>3 = >5 neutrophils                                                                                                                                                     | 0<br>1<br>2<br>3         |
|                                 | Extent            | Extent of inflammatory cell infiltration:<br>Mucosal<br>Mucosal and submucosal<br>Mucosal, submucosal, and transmural                                                                                                                                                                                                              | 0.5<br>1<br>1.5          |
| Epithelial Changes <sup>2</sup> | Hyperplasia       | Percent above height of control/baseline crypt (0.2 mm); visible as crypt elongation:<br>No change: 0<br>Mild: 1- 50%<br>Moderate: 51-100%<br>Marked: >100%                                                                                                                                                                        | 0<br>1<br>2<br>3         |
|                                 | Goblet Cell Count | Change in goblet cell numbers relative to baseline goblet cell numbers per crypt:<br>0 = No change from baseline goblet cell count<br>1 = Increase or decrease of 1-3 goblet cells from baseline<br>2 = Increase or decrease of 4-8 goblet cells from baseline<br>3 = Increase or decrease of 8 or more goblet cells from baseline | 0<br>1<br>2<br>3         |
|                                 | Erosion           | Loss of surface epithelium:<br>0 = No pathological changes observed<br>1= Attenuation (gaps of 1-10 epithelial cells/lesion)<br>1.5 = Absence of epithelium (gaps of >10 epithelial cells/lesion)                                                                                                                                  | 0<br>1<br>1.5            |
|                                 | Dysplasia         | Ordered arrangement of crypt epithelial cells & crypt epithelial cell nuclei; loss of epithelial polarity<br>Mild: Mostly ordered arrangement, nuclei are in basal location<br>Moderate: Slightly disordered arrangement, some nuclei are near/in apical location<br>Severe: Disordered arrangement, nuclei are in apical location | 0<br>1<br>2              |
| Mucosal Architecture            | Crypt Loss        | Mucosa devoid of crypts                                                                                                                                                                                                                                                                                                            | 1                        |

<sup>1</sup>Score Value Max = 15 points; <sup>2</sup>From well-oriented samples with longitudinally cut crypts only; Modified from Erben *et al.* (2014) and Bischor *et al.* (2017).

Table S2. Disease Activity Index (DAI) scoring criteria modified from Maxwell *et al.* (2009).

| <b>DISEASE ACTIVITY INDEX (DAI)</b> |                      |                                         |                |
|-------------------------------------|----------------------|-----------------------------------------|----------------|
| <b>Stool Consistency</b>            | <b>Stool Blood</b>   | <b>Body Weight Loss (%)<sup>a</sup></b> | <b>Score</b>   |
| Normal                              | Normal               | 0-1 %                                   | 0              |
| Moist and Sticky                    | Brown/Reddish Colour | 1-5 %                                   | 1              |
| Soft                                | Visible Blood        | 5-10 %                                  | 2 <sup>b</sup> |
| Diarrhea                            | Rectal Bleeding      | 10-20 % <sup>c</sup>                    | 3              |

<sup>a</sup> % Body Weight Loss =  $\frac{(\text{Body Weight on Day X} - \text{Initial Body Weight})}{\text{Initial Body Weight}} \times 100$

<sup>b</sup> If a mouse scores  $\geq 2$  in any of the above criteria, supportive therapy must be initiated, and monitoring increased to 4 times per day.

<sup>c</sup> If a mouse scores  $\geq 20\%$  body weight loss, it will be euthanized.

Table S3. Primer sequences used for RT-qPCR analysis.

| GENE                            | FORWARD (5' - 3')       | REVERSE (5' - 3')        | EFFICIENCY (%) |
|---------------------------------|-------------------------|--------------------------|----------------|
| <b><math>\beta</math>-Actin</b> | CTTCTTTGCAGCTCCTTCGTT   | TTCTGACCCATTCCCACCA      | 96.2           |
| <b>GAPDH</b>                    | CCTCGTCCCGTAGACAAAATG   | TGAAGGGGTCGTTGATGGC      | 92.7           |
| <b>Muc1</b>                     | GGCATTTCGGGCTCCTTTCTT   | TGGAGTGGTAGTCGATGCTAAG   | 103.1          |
| <b>Muc2</b>                     | AGGGCTCGGAACTCCAGAAA    | CCAGGGAATCGGTAGACATCG    | 105.5          |
| <b>Reg3<math>\beta</math></b>   | ACTCCCTGAAGAATATACCCTCC | CGCTATTGAGCACAGATACGAG   | 102.1          |
| <b>Reg3<math>\gamma</math></b>  | ATGCTTCCCGTATAACCATCA   | GGCCATATCTGCATCATACCAG   | 98.2           |
| <b>sPLA2</b>                    | TGGCTCAATACAGGACCAAGG   | GTGGCATCCATAGAAGGCATAG   | 99.7           |
| <b>BAX</b>                      | TGAAGACAGGGGCCTTTTGTG   | AATTCGCCGGAGACACTCG      | 101.2          |
| <b>BCL3</b>                     | CCGGAGGCCCTTTACTACCA    | GGAGTAGGGGTGAGTAGGCAG    | 104.4          |
| <b>EGR1</b>                     | AGACGAGTTATCCCAGCCAAA   | GGTCGGAGGATTGGTCATGC     | 105.7          |
| <b>TLR6</b>                     | TGAGCCAAGACAGAAAACCCA   | GGGACATGAGTAAGGTTCTGTGTT | 100.9          |
| <b>TLR2</b>                     | GCAAACGCTGTTCTGCTCAG    | AGGCGTCTCCCTCTATTGTATT   | 102.0          |
| <b>SOCS3</b>                    | ATGGTCACCCACAGCAAGTTT   | TCCAGTAGAATCCGCTCTCCT    | 105.2          |
| <b>VCAM-1</b>                   | AGTTGGGGATTTCGGTTGTTCT  | CCCCTCATTCTTACCACCC      | 96.5           |
| <b>HIF1<math>\alpha</math></b>  | ACCTTCATCGGAACTCCAAAAG  | ACTGTTAGGCTCAGGTGAACT    | 106.5          |
| <b>Camp</b>                     | GCTGTGGCGGTCACTATCAC    | TGTCTAGGGACTGCTGGTTGA    | 102.0          |
| <b>ANG4</b>                     | GGTTGTGATTCTCCTCAACTCTG | CTGAAGTTTTCTCCATAAGGGCT  | 102.1          |
| <b>IRF7</b>                     | ATGCCAATCACTCGAATGAG    | TTGTATCGGCCTGTGTGAATG    | 96.8           |
| <b>CASP1</b>                    | CTTGAGACATCCTGTCAGGG    | AGTCACAAGACCAGGCATATTCT  | 106.3          |
